# Supplementary material for: Numerical simulations of the Cordilleran ice sheet through the last glacial cycle
Source: Copernicus journal article supplement (doi:10.5194/tc-10-639-2016), 2016-03-16
Supplement: Supplementary file 1 [file tc-10-639-2016-supplement.zip]

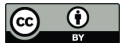

*Supplement of*

## **Numerical simulations of the Cordilleran ice sheet through the last glacial cycle**

**Julien Seguinot et al.**

*Correspondence to:* Julien Seguinot ([seguinot@vaw.baug.ethz.ch](mailto:seguinot@vaw.baug.ethz.ch))

- [tc-10-639-2016-supplement-title-page.pdf](#)
- [anim\\_cordillera\\_cycle.mp4](#)

The copyright of individual parts of the supplement might differ from the CC-BY 3.0 licence.
